# Supplementary material for: Discrimination of Acne Vulgaris with Human Scalp Hair Tissues Using - FTIR-ATR Spectroscopy
Source: Preprints.org preprint supplement (doi:10.20944/preprints201909.0166.v1), 2019-09-16
Supplement: Supplementary file 3 [file supplementary]

**Figures**

**
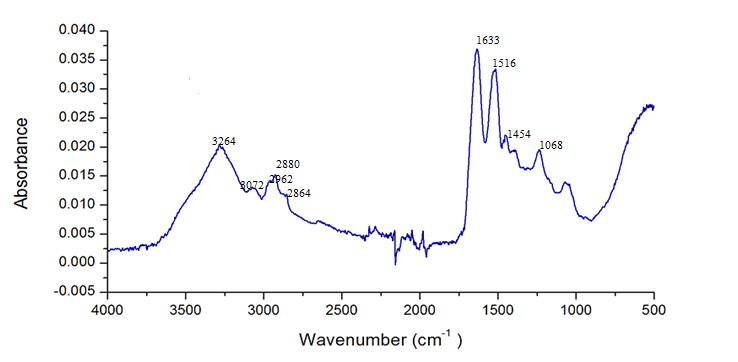
**

**Figure 1 Average FTIR-ATR Spectrum of healthy Human Scalp Hair tissue**


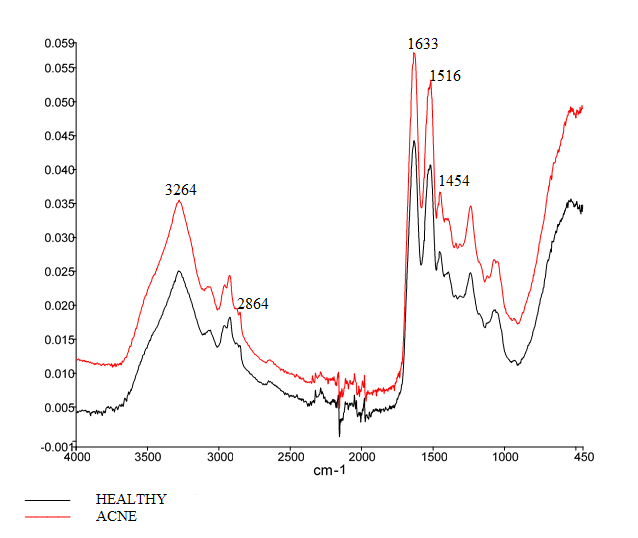


**Figure 2 Overlaid Average FTIR-ATR Spectra of Healthy and Acne Vulgaris Human Scalp Hair tissues**

**Figure 3. Histogram Indicating the Mean Intensity Ratios of Healthy and Acne Vulgaris**

**Hair tissues**

**Fig 4. Group Statistics T-Test of Hair tissue of Healthy and Acne Vulgaris tissues**
